# Supplementary material for: Phase III, randomised, double-blind, placebo-controlled trial of Neuroaspis plp10 as an adjuvant treatment for relapsing multiple sclerosis: the MINERAL Study
Source: PubMed Central journal article supplement — BMJ Neurol Open. 2022 Nov 4;4(2):e000334. doi: 10.1136/bmjno-2022-000334 (PMC9639060; doi:10.1136/bmjno-2022-000334), 2022-11-04
Supplement: bmjno-2022-000334supp001.pdf [file bmjno-2022-000334supp001.pdf]

**Supplementary Table 1.** Demographic, clinical and MRI baseline characteristics for the per protocol (PP) population by treatment arm

|                                                              | Placebo |                                    |     |       | Neuroaspis® plp10 |                                    |     |       | p-value |
|--------------------------------------------------------------|---------|------------------------------------|-----|-------|-------------------|------------------------------------|-----|-------|---------|
|                                                              | N       | mean±SD/<br>median [IQR]/<br>N (%) | min | max   | N                 | mean±SD/<br>median [IQR]/<br>N (%) | min | max   |         |
| Age                                                          | 20      | 38.1±6.84                          | 26  | 55    | 19                | 40.16±8.41                         | 28  | 55    | 0.384   |
| Sex (female)                                                 | 20      | 11 (55)                            | -   | -     | 19                | 12 (63.16)                         | -   | -     | 0.605   |
| Years of diagnosis                                           | 20      | 11.15±7.31                         | 2   | 28    | 19                | 10.84±6.08                         | 4   | 26    | 0.833   |
| Weight (kg)                                                  | 20      | 69.6±15.73                         | 48  | 105   | 19                | 69.32±12.98                        | 46  | 100   | 0.978   |
| Height (cm)                                                  | 20      | 167.85±7.8                         | 155 | 186   | 19                | 168±8.96                           | 155 | 183   | 0.933   |
| EDSS score visit 1 (normalization phase)                     | 20      | 2.5 [1.5-3.5]                      | 1   | 5     | 19                | 2 [1.5-3.5]                        | 1   | 4     | 0.663   |
| EDSS score visit 2 (baseline)                                | 20      | 2.5 [1.5-3.5]                      | 1   | 5     | 19                | 2 [1.5-3.5]                        | 1   | 4     | 0.555   |
| Annualized relapse rate (estimated from normalization phase) | 20      | 0.3±0.74                           | 0   | 2.23  | 19                | 0±0                                | 0   | 0     | 0.083   |
| Relapses at normalization phase                              | 20      |                                    |     |       | 19                |                                    |     |       |         |
| <b>0</b>                                                     |         | 17 (85)                            | -   | -     |                   | 19 (100)                           | -   | -     | 0.231*  |
| <b>1</b>                                                     |         | 3 (15)                             | -   | -     |                   | 0 (0)                              | -   | -     |         |
| Total number of T1-enhancing lesions                         | 19      | 0.21±0.54                          | 0   | 2     | 19                | 0.42±0.84                          | 0   | 3     | 0.559   |
| T1-enhancing lesion volume (cubic mm)                        | 19      | 20.53±48.84                        | 0   | 142   | 19                | 58.53±150.04                       | 0   | 589   | 0.609   |
| T2-hyperintense lesion volume (cubic mm)                     | 20      | 5369.45±4524.28                    | 185 | 14548 | 19                | 4233.95±3121.6                     | 488 | 10119 | 0.613   |

Abbreviations: EDSS: Expanded Disability Status Scale (range of scores, 0 to 10, with higher scores indicating more severe disease); IQR: interquartile range; SD: standard deviation; ITT, intention to treat

Percentages may not sum to 100, because of rounding

\* Fisher's exact test

**Supplementary Table 2.** Primary Endpoint as Determined by Clinical Results for the per protocol (PP) population\*

|                          | <b>N</b> | <b>Relapses in 2 years</b> | <b>ARR (95% CI)</b> | <b>min</b> | <b>max</b> |
|--------------------------|----------|----------------------------|---------------------|------------|------------|
| <b>Placebo</b>           | 20       | 27                         | 0.68 (0.45, 0.99)   | 0          | 1.54       |
| <b>Neuroaspis® plp10</b> | 19       | 0                          | 0.00 (0.00, 0.10)   | 0          | 0.00       |

\* ARR, annualized relapse rate; CI, confidence interval; IRR, incidence rate ratio; SD, standard deviation.

\*\* Adjusted for: Age, sex, years of diagnosis, baseline EDSS, relapses during normalization.

**Supplementary Table 3.** Secondary Endpoint as Determined by Magnetic Resonance Imaging (MRI) Evaluation for the per protocol (PP) population\*

| <b>Analysis</b>                                                      | <b>IRR (95% CI)</b> | <b>p-value</b> |
|----------------------------------------------------------------------|---------------------|----------------|
| <b>Number of T1-enhancing lesions (month 30)</b>                     | 0.29 (0.08, 1.00)   | 0.05           |
| <b>New/enlarging T2-hyperintense lesions at month 30 vs baseline</b> | 0.29 (0.20, 0.41)   | <0.0001        |

Abbreviations: IRR, Incidence rate ratio; CI, confidence interval

\* All analyses adjusted for: Age, sex, years of diagnosis, baseline EDSS, relapses during normalization.

**Supplement Figure 1.** Secondary endpoint, Expanded Disability Status Scale (EDSS) data analyses for the per-protocol (PP) population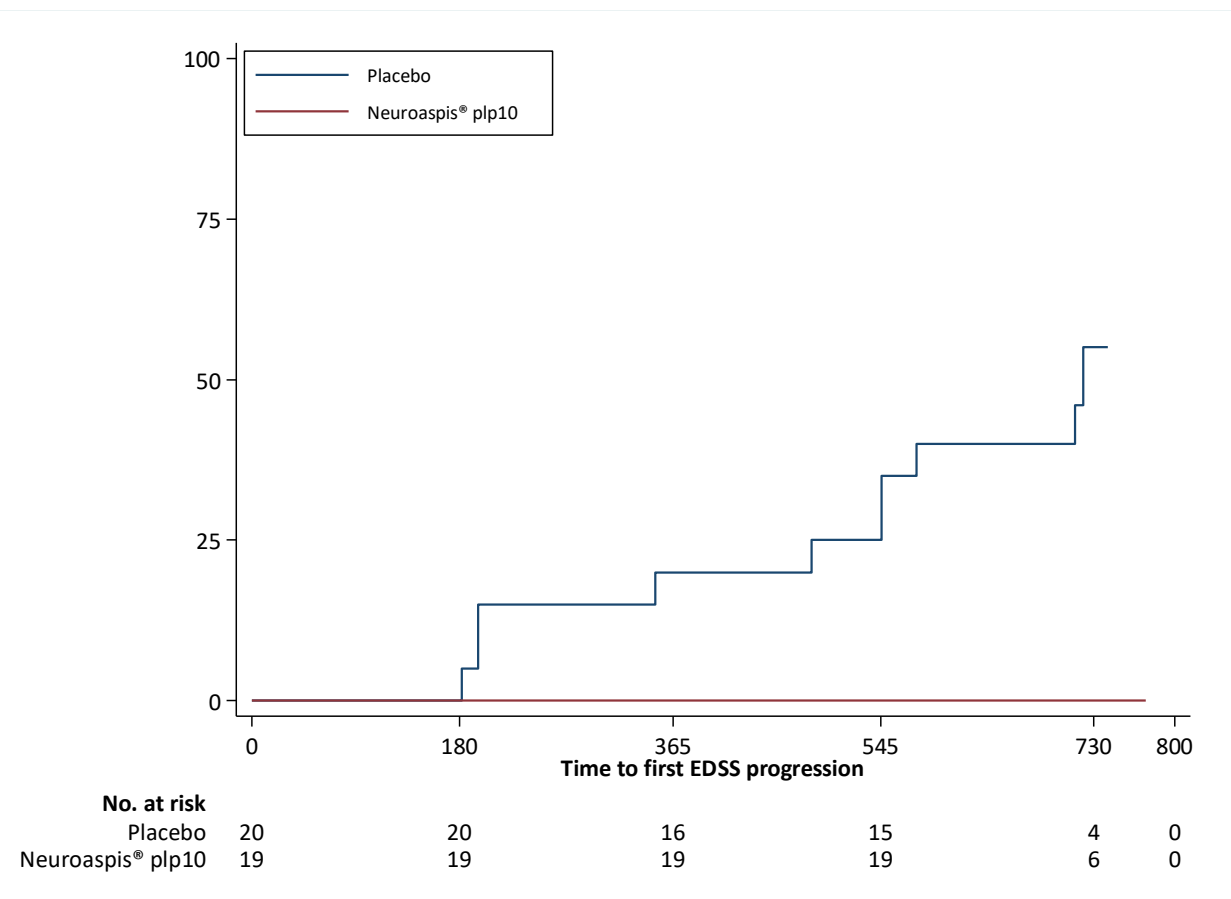

Kaplan–Meier Plots of the Time to Sustained Progression of Disability among Patients Receiving Neuroaspis® plp10 as Compared with Placebo for the PP population. The cumulative probability of progression was 0% in the Neuroaspis® plp10 and 55% in the placebo group.
